# Supplementary material for: Guanidine sulfate-assisted synthesis of hexagonal WO3 nanoparticles with enhanced adsorption properties
Source: Royal Society of Chemistry journal article supplement (doi:10.1039/c5dt00103j), 2015-01-01
Supplement: c5dt00103j1.pdf [file c5dt00103j1.pdf]

## Supporting information

### **Guanidine sulfate-assisted synthesis of hexagonal WO<sub>3</sub> nanoparticles with enhanced adsorption properties**

Wanjun Mu, Mei Li, Xingliang Li, Zongping Ma, Rui Zhang, Qianhong Yu, Xiang Xie, Kai  
Lv, Hongyuan Wei\*, Yuan Jian

*Institute of Nuclear Physics and Chemistry, China Academy of Engineering Physics, 64# Mianshan Road*

---

\*Corresponding author: Tel: +86 816 2494854.

*E-mail address:* muwj2014@163.com

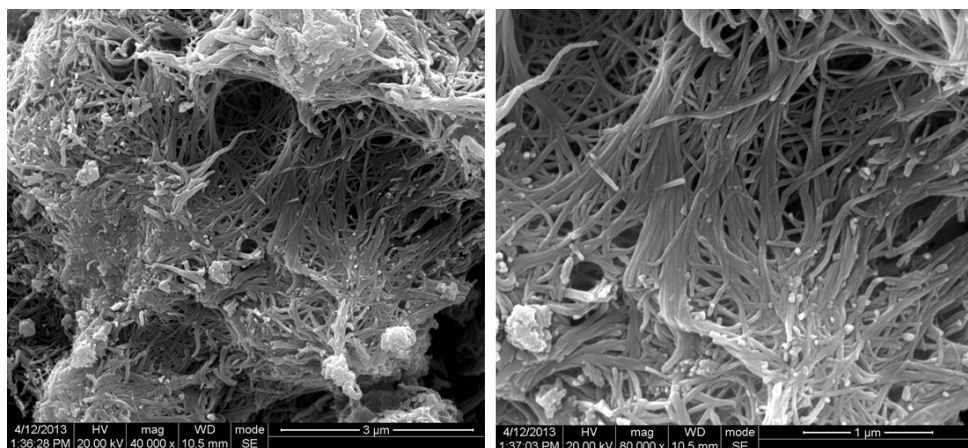

**Fig.1. SEM images of the samples synthesized via hydrothermal treatment at 170 °C for 24 h with addition of 5 g  $C_2H_{10}N \cdot H_2SO_4$**

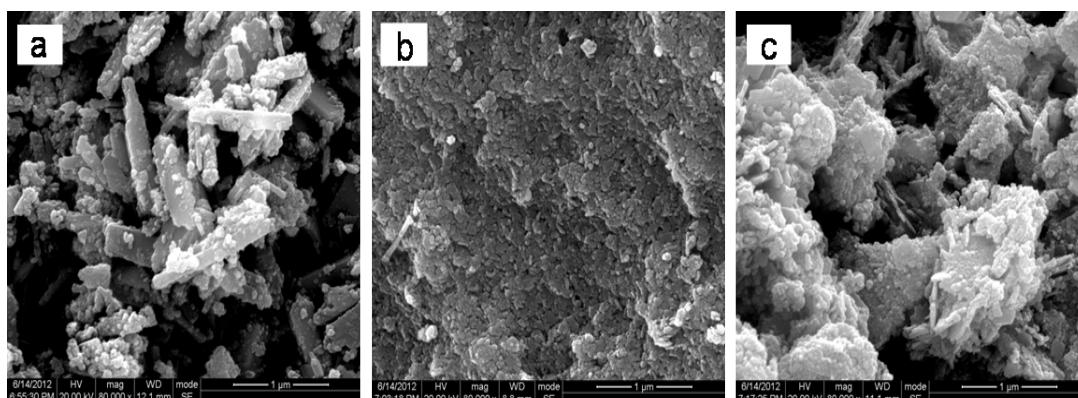

**Fig.2. SEM images of  $WO_3$  nanocrystals synthesized with different salts (a)  $CH_5N_3 \cdot HCl$ , (b)  $C_2H_{10}N_6 \cdot H_2CO_3$ , (c)  $C_2H_6N_4S$ .**

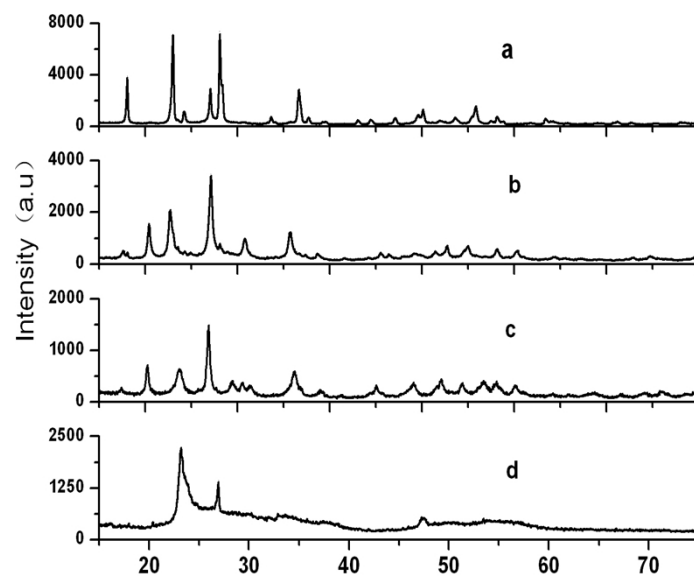

**Fig.3. XRD patterns of  $\text{WO}_3$  nanocrystals synthesized with different salts, (a)  $\text{CH}_5\text{N}_3\cdot\text{HCl}$ , (b)  $\text{C}_2\text{H}_{10}\text{N}_6\cdot\text{H}_2\text{CO}_3$ , (c)  $\text{C}_2\text{H}_6\text{N}_4\text{S}$ .**

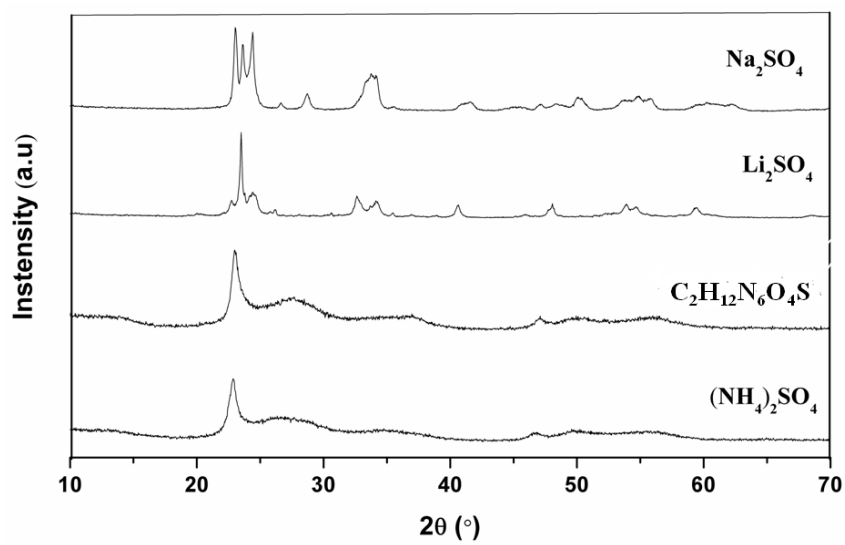

**Fig.4 XRD patterns of  $\text{WO}_3$  nanocrystals synthesized with different salts**
